# Supplementary material for: Measures of Care Coordination at Inpatient Psychiatric Facilities and the Medicare 30-Day All-Cause Readmission Rate
Source: Atypon-hosted journal article supplement (doi:10.1176/appi.ps.201900360), 2020-08-25
Supplement: appi.ps.201900360.ds001.pdf [file appi.ps.201900360.ds001.pdf]

**Appendix 1.** Missing data details**Reasons for missing IPFQR care coordination measure performance for facilities with publicly reported readmission rates (n=1,631)**

|                               | Facilities with Publicly Available Performance Rates | Facilities where the Number of Cases is Too Few to Report (i.e. number of cases doesn't meet the required minimum amount for public reporting, number of cases is too small to reliably gauge performance, and/or to protect personal health information) | Facilities where Results are Not Available for Reporting Period (i.e. facility elected not to submit data for reporting period, elected to suppress measure from public reporting, or had no claims data for the measure) | No Cases Met Criteria for Measure (i.e. facility didn't have any cases meet the inclusion criteria for the measure) |
|-------------------------------|------------------------------------------------------|-----------------------------------------------------------------------------------------------------------------------------------------------------------------------------------------------------------------------------------------------------------|---------------------------------------------------------------------------------------------------------------------------------------------------------------------------------------------------------------------------|---------------------------------------------------------------------------------------------------------------------|
| “Transition-1” (Jan-Dec 2017) | 1,493 (98.68%)                                       | 1 (0.07%)                                                                                                                                                                                                                                                 | 11 (0.73%)                                                                                                                                                                                                                | 8 (0.53%)                                                                                                           |
| “Transition-2” (Jan-Dec 2017) | 1,491 (98.55%)                                       | 1 (0.07%)                                                                                                                                                                                                                                                 | 11 (0.73%)                                                                                                                                                                                                                | 10 (0.66%)                                                                                                          |
| FUH-7 (July 2015-June 2016)   | 1,116 (73.76%)                                       | 368 (24.32%)                                                                                                                                                                                                                                              | 24 (1.59%)                                                                                                                                                                                                                | 5 (0.33%)                                                                                                           |
| FUH-30 (July 2015-June 2016)  | 1,300 (85.92%)                                       | 184 (12.16%)                                                                                                                                                                                                                                              | 24 (1.59%)                                                                                                                                                                                                                | 5 (0.33%)                                                                                                           |
| FUH-7 (July 2016-June 2017)   | 1,454 (96.10%)                                       | 54 (3.57%)                                                                                                                                                                                                                                                | 5 (0.33%)                                                                                                                                                                                                                 | 0 (0%)                                                                                                              |
| FUH-30 (July 2016-June 2017)  | 1,454 (96.10%)                                       | 54 (3.57%)                                                                                                                                                                                                                                                | 5 (0.33%)                                                                                                                                                                                                                 | 0 (0%)                                                                                                              |

Source: Hospital Compare

### Missing data flow diagram

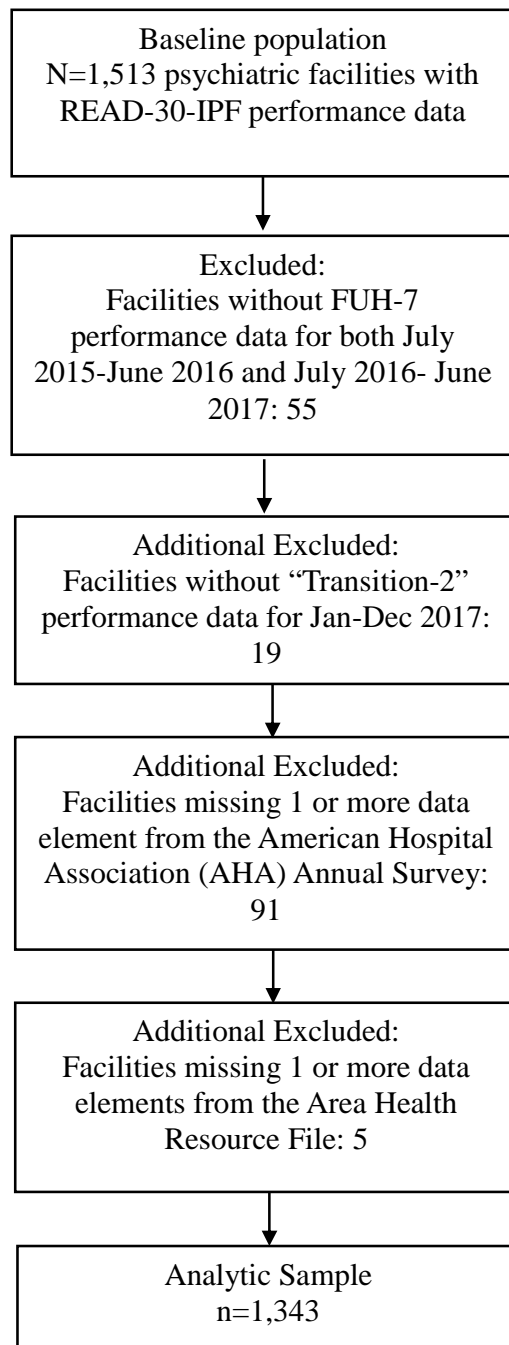

**Appendix 2.** Measure specifications for the IPFQR measures

**30-Day Readmission Measure**

|                        |                                                                                                                                                                                                                                                                                                                                                                                                                                                                                                                                                                                                                                                                                                                                                                          |
|------------------------|--------------------------------------------------------------------------------------------------------------------------------------------------------------------------------------------------------------------------------------------------------------------------------------------------------------------------------------------------------------------------------------------------------------------------------------------------------------------------------------------------------------------------------------------------------------------------------------------------------------------------------------------------------------------------------------------------------------------------------------------------------------------------|
| Measure Short Name     | READM-30-IPF                                                                                                                                                                                                                                                                                                                                                                                                                                                                                                                                                                                                                                                                                                                                                             |
| Measure Full Name      | Thirty-Day All-Cause Unplanned Readmission Following Psychiatric Hospitalization in an Inpatient Psychiatric Facility                                                                                                                                                                                                                                                                                                                                                                                                                                                                                                                                                                                                                                                    |
| Measure Type           | Outcome measure                                                                                                                                                                                                                                                                                                                                                                                                                                                                                                                                                                                                                                                                                                                                                          |
| NQF Endorsement Status | Endorsed, NQF ID: 2860                                                                                                                                                                                                                                                                                                                                                                                                                                                                                                                                                                                                                                                                                                                                                   |
| Numerator              | Discharges from inpatient psychiatric facilities (facilities paid through the IPF PPS) that result in readmissions to general medical acute care facilities (facilities paid through the IPPS or critical access hospitals) or inpatient psychiatric facilities (facilities paid through the IPF PPS) within 30-days of discharge                                                                                                                                                                                                                                                                                                                                                                                                                                        |
| Denominator            | Discharges from inpatient psychiatric facilities                                                                                                                                                                                                                                                                                                                                                                                                                                                                                                                                                                                                                                                                                                                         |
| Inclusion Criteria     | <ul style="list-style-type: none"> <li>• Discharge from a psychiatric facility paid through the IPF PPS</li> <li>• Principal discharge diagnosis of a mental health disorder, substance use disorder, or dementia/Alzheimer’s disease</li> <li>• 18 years or older at time of admission</li> <li>• Alive at time of discharge</li> <li>• Enrolled in Medicare Parts A and B for twelve months prior to the admission, during the admission, and for one month following the admission</li> </ul>                                                                                                                                                                                                                                                                         |
| Exclusion Criteria     | <ul style="list-style-type: none"> <li>• Discharges against medical advice</li> <li>• Transfers (defined as an admission to another psychiatric facility or acute care hospital that occurs on the day of discharge or the day following discharge from the index admission)</li> <li>• Readmissions to the same psychiatric facility within two days of discharge as these readmissions are combined into the same claim as the index admission and thus do not appear as readmissions due to the interrupted stay billing policy</li> <li>• Encounters with subsequent planned readmissions based on the CMS 30-day Hospital Wide Readmission Measure Planned Readmission Algorithm</li> <li>• Encounters with unreliable demographic and vital status data</li> </ul> |
| Risk Adjustment        | The READM-30-IPF measure is risk adjusted using a hierarchical logistic regression model. The risk adjustment is based on patient’s age, gender, principal discharge diagnosis for the index admission, medical and psychiatric comorbidities, history of suicide attempt/self-harm, history of aggression, or history of being discharged against medical advice. The comorbidity and history risk factors are based on claims from the index admission and from the twelve months prior to admission.                                                                                                                                                                                                                                                                  |
| Measure                | Claims-based measure                                                                                                                                                                                                                                                                                                                                                                                                                                                                                                                                                                                                                                                                                                                                                     |

|                                  |                                                                                                                                                                                                                                                                                                                                                                                                                                                                                                                                                                                                                                                                                                                                                                                                                                                                                                                                                                                                                                                                                                                                                                                                                                                                                                                                                                                                                                                                                                                                                                                                                                                                                                                                |
|----------------------------------|--------------------------------------------------------------------------------------------------------------------------------------------------------------------------------------------------------------------------------------------------------------------------------------------------------------------------------------------------------------------------------------------------------------------------------------------------------------------------------------------------------------------------------------------------------------------------------------------------------------------------------------------------------------------------------------------------------------------------------------------------------------------------------------------------------------------------------------------------------------------------------------------------------------------------------------------------------------------------------------------------------------------------------------------------------------------------------------------------------------------------------------------------------------------------------------------------------------------------------------------------------------------------------------------------------------------------------------------------------------------------------------------------------------------------------------------------------------------------------------------------------------------------------------------------------------------------------------------------------------------------------------------------------------------------------------------------------------------------------|
| Collection                       |                                                                                                                                                                                                                                                                                                                                                                                                                                                                                                                                                                                                                                                                                                                                                                                                                                                                                                                                                                                                                                                                                                                                                                                                                                                                                                                                                                                                                                                                                                                                                                                                                                                                                                                                |
| Sampling                         | No sampling                                                                                                                                                                                                                                                                                                                                                                                                                                                                                                                                                                                                                                                                                                                                                                                                                                                                                                                                                                                                                                                                                                                                                                                                                                                                                                                                                                                                                                                                                                                                                                                                                                                                                                                    |
| Data Elements Publicly Available | READM-30-IPF_Denominator<br>READM-30-IPF_Rate<br>READM-30-IPF_Lower_Estimate<br>READM-30-IPF_Higher_Estimate                                                                                                                                                                                                                                                                                                                                                                                                                                                                                                                                                                                                                                                                                                                                                                                                                                                                                                                                                                                                                                                                                                                                                                                                                                                                                                                                                                                                                                                                                                                                                                                                                   |
| Sources                          | <p>CMS. “Inpatient Psychiatric Facility Quality Reporting Program Claims-Based Measure Specifications.” Quality Reporting Center, December 2018. <a href="https://www.qualityreportingcenter.com/globalassets/ipf-tools-and-resources/181203_fy2019_ipfqr_cbm_specs_508.pdf">https://www.qualityreportingcenter.com/globalassets/ipf-tools-and-resources/181203_fy2019_ipfqr_cbm_specs_508.pdf</a>.</p> <p>CMS. “Inpatient Psychiatric Facility Quality Reporting Program Manual.” Quality Reporting Center, November 10, 2016. <a href="https://www.qualityreportingcenter.com/globalassets/migrated-pdf/ipf_programmanual_v2.2_20161110_final508.pdf">https://www.qualityreportingcenter.com/globalassets/migrated-pdf/ipf_programmanual_v2.2_20161110_final508.pdf</a>.</p> <p>Duseja, Reena, and Megan Keenan. “Measure Dry Run: Thirty-Day All-Cause Unplanned Readmission Following Psychiatric Hospitalization in an Inpatient Psychiatric Facility.” October 31, 2017. <a href="https://www.qualityreportingcenter.com/en/inpatient-quality-reporting-programs/inpatient-psychiatric-facilities-quality-reporting-program/archived-events/ipfqr-event163/">https://www.qualityreportingcenter.com/en/inpatient-quality-reporting-programs/inpatient-psychiatric-facilities-quality-reporting-program/archived-events/ipfqr-event163/</a>.</p> <p>CMS Measure Inventory Tool (CMIT). “Thirty-Day All-Cause Unplanned Readmission Following Psychiatric Hospitalization in an Inpatient Psychiatric Facility (IPF).” Centers of Medicare and Medicaid Services, May 31, 2019. <a href="https://cmit.cms.gov/CMIT_public/ViewMeasure?MeasureId=2800">https://cmit.cms.gov/CMIT_public/ViewMeasure?MeasureId=2800</a>.</p> |

### 7-Day and 30-Day Follow-up Measures

|                        |                                                                                                                                                                                                                                                                                                                                                                                                                |
|------------------------|----------------------------------------------------------------------------------------------------------------------------------------------------------------------------------------------------------------------------------------------------------------------------------------------------------------------------------------------------------------------------------------------------------------|
| Measure Short Name     | FUH-7 or FUH-30                                                                                                                                                                                                                                                                                                                                                                                                |
| Measure Full Name      | Follow-Up After Hospitalization for Mental Illness (within 7-days or 30-days)                                                                                                                                                                                                                                                                                                                                  |
| Measure Type           | Process measure                                                                                                                                                                                                                                                                                                                                                                                                |
| NQF Endorsement Status | Endorsed, NQF ID: 0576                                                                                                                                                                                                                                                                                                                                                                                         |
| Numerator              | Discharges from inpatient psychiatric facilities that have an outpatient mental health encounter (includes partial hospitalization, intensive outpatient treatment, or outpatient visit with a psychiatrist, neurologist, psychiatric nurse practitioner, psychiatric physician assistant, psychologist, clinical social worker, and psychiatric occupational therapist) within 7-days or 30-days of discharge |
| Denominator            | Discharges from inpatient psychiatric facilities                                                                                                                                                                                                                                                                                                                                                               |
| Inclusion Criteria     | <ul style="list-style-type: none"> <li>Discharge from a psychiatric facility paid through the IPF PPS</li> <li>Principal discharge diagnosis of a mental health disorder (does not include substance use disorders or dementia/Alzheimer’s disease)</li> </ul>                                                                                                                                                 |

|                    |                                                                                                                                                                                                                                                                                                                                                                                                                                                                                                                                                                                                                                                                                                                                                                                                                                                                                                                                                                                                                                                                                       |
|--------------------|---------------------------------------------------------------------------------------------------------------------------------------------------------------------------------------------------------------------------------------------------------------------------------------------------------------------------------------------------------------------------------------------------------------------------------------------------------------------------------------------------------------------------------------------------------------------------------------------------------------------------------------------------------------------------------------------------------------------------------------------------------------------------------------------------------------------------------------------------------------------------------------------------------------------------------------------------------------------------------------------------------------------------------------------------------------------------------------|
|                    | <ul style="list-style-type: none"> <li>• Discharged alive</li> <li>• Continuous enrollment in Medicare Parts A and B during the month of the discharge date and at least one month after the discharge date</li> <li>• Six years of age or older on the date of discharge</li> </ul>                                                                                                                                                                                                                                                                                                                                                                                                                                                                                                                                                                                                                                                                                                                                                                                                  |
| Exclusion Criteria | <ul style="list-style-type: none"> <li>• Admitted or transferred to acute and non-acute inpatient facilities (SNF, Hospice, inpatient rehab, respite, intermediate care facility, residential substance abuse and psychiatric treatment facilities) within the follow-up period (includes both psychiatric and medical facilities)</li> <li>• Discharged/transferred to other institutions (includes inpatient care, skilled nursing facility, court/law enforcement, inpatient rehabilitation facility, long-term care hospital) based on discharge code</li> <li>• Death during the follow-up period</li> <li>• Patients who use hospice services or elect to use a hospice benefit any time during the measurement year</li> </ul>                                                                                                                                                                                                                                                                                                                                                 |
| Risk Adjustment    | None                                                                                                                                                                                                                                                                                                                                                                                                                                                                                                                                                                                                                                                                                                                                                                                                                                                                                                                                                                                                                                                                                  |
| Measure Collection | Claims-based measure (i.e. follow-up must be billed to Medicare to be counted towards measure)                                                                                                                                                                                                                                                                                                                                                                                                                                                                                                                                                                                                                                                                                                                                                                                                                                                                                                                                                                                        |
| Sampling           | No sampling                                                                                                                                                                                                                                                                                                                                                                                                                                                                                                                                                                                                                                                                                                                                                                                                                                                                                                                                                                                                                                                                           |
| Citations          | <p>CMS. “Inpatient Psychiatric Facility Quality Reporting Program Claims-Based Measure Specifications.” Quality Reporting Center, December 2018. <a href="https://www.qualityreportingcenter.com/globalassets/ipf-tools-and-resources/181203_fy2019_ipfqr_cbm_specs_508.pdf">https://www.qualityreportingcenter.com/globalassets/ipf-tools-and-resources/181203_fy2019_ipfqr_cbm_specs_508.pdf</a>.</p> <p>CMS. “Inpatient Psychiatric Facility Quality Reporting Program Manual.” Quality Reporting Center, November 10, 2016. <a href="https://www.qualityreportingcenter.com/globalassets/migrated-pdf/ipf_programmanual_v2.2_20161110_final508.pdf">https://www.qualityreportingcenter.com/globalassets/migrated-pdf/ipf_programmanual_v2.2_20161110_final508.pdf</a>.</p> <p>CMS Measure Inventory Tool (CMIT). “Follow-Up After Hospitalization for Mental Illness (FUH).” Centers of Medicare and Medicaid Services, May 31, 2019. <a href="https://cmit.cms.gov/CMIT_public/ReportMeasure?measureId=745">https://cmit.cms.gov/CMIT_public/ReportMeasure?measureId=745</a></p> |

### Transition Record Measures

|                        |                                                                                                                                                         |
|------------------------|---------------------------------------------------------------------------------------------------------------------------------------------------------|
| Measure Short Name     | No official short name; referred to in this paper as “Transition-1” and “Transition-2”                                                                  |
| Measure Full Name      | “Transition-1” – Transition Record with Specified Elements Received by Discharged Patients<br>“Transition-2” – Timely Transmission of Transition Record |
| Measure Type           | Process measure                                                                                                                                         |
| NQF Endorsement Status | “Transition-1” – Endorsement Removed, NQF ID: 0649<br>“Transition-2” – Not Endorsed, NQF ID: 0648                                                       |
| Numerator              | “Transition-1” – Patients/caregivers who received a discharge plan at the time of discharge that includes the following eleven elements:                |

|                                   | <ol style="list-style-type: none"> <li>1) Reason for inpatient admission;</li> <li>2) Major procedures and tests performed during inpatient stay and summary of results;</li> <li>3) Principal diagnosis at discharge;</li> <li>4) Current medication list;</li> <li>5) Studies pending at discharge;</li> <li>6) Contact information for obtaining pending results;</li> <li>7) Post-discharge self-management instructions;</li> <li>8) Medical and psychiatric advance care plan or documented reason for not providing advance care plan;</li> <li>9) 24-hour/7-day contact information for emergencies related to inpatient stay;</li> <li>10) Plan for follow-up care; and</li> <li>11) Site designated for follow-up care</li> </ol> <p>“Transition-2” – Discharge plan contains eleven elements and is transmitted to the facility or health care professional designated for follow-up care within 24 hours of discharge</p> |                                   |                                        |         |       |               |     |             |     |         |           |
|-----------------------------------|---------------------------------------------------------------------------------------------------------------------------------------------------------------------------------------------------------------------------------------------------------------------------------------------------------------------------------------------------------------------------------------------------------------------------------------------------------------------------------------------------------------------------------------------------------------------------------------------------------------------------------------------------------------------------------------------------------------------------------------------------------------------------------------------------------------------------------------------------------------------------------------------------------------------------------------|-----------------------------------|----------------------------------------|---------|-------|---------------|-----|-------------|-----|---------|-----------|
| Denominator                       | Discharges from inpatient psychiatric facilities (“Transition-1” and “Transition-2” have the same denominator)                                                                                                                                                                                                                                                                                                                                                                                                                                                                                                                                                                                                                                                                                                                                                                                                                        |                                   |                                        |         |       |               |     |             |     |         |           |
| Inclusion Criteria                | <ul style="list-style-type: none"> <li>• All patients discharged from inpatient psychiatric facility, regardless of age, payer, or discharge location</li> </ul>                                                                                                                                                                                                                                                                                                                                                                                                                                                                                                                                                                                                                                                                                                                                                                      |                                   |                                        |         |       |               |     |             |     |         |           |
| Exclusion Criteria                | <ul style="list-style-type: none"> <li>• Death</li> <li>• Left against medical advice (AMA)</li> <li>• Elopement</li> <li>• Failure to return from leave</li> </ul>                                                                                                                                                                                                                                                                                                                                                                                                                                                                                                                                                                                                                                                                                                                                                                   |                                   |                                        |         |       |               |     |             |     |         |           |
| Risk Adjustment                   | None                                                                                                                                                                                                                                                                                                                                                                                                                                                                                                                                                                                                                                                                                                                                                                                                                                                                                                                                  |                                   |                                        |         |       |               |     |             |     |         |           |
| Measure Collection                | Chart-abstracted measure (facilities must abstract charts and report aggregate rates of measure adherence to CMS)                                                                                                                                                                                                                                                                                                                                                                                                                                                                                                                                                                                                                                                                                                                                                                                                                     |                                   |                                        |         |       |               |     |             |     |         |           |
| Sampling                          | <p>Sampling based on total number of discharges</p> <table border="1"> <thead> <tr> <th>Total Number of Annual Discharges</th> <th>Number of Annual Records to be Sampled</th> </tr> </thead> <tbody> <tr> <td>≥ 6,117</td> <td>1,224</td> </tr> <tr> <td>3,057 – 6,116</td> <td>20%</td> </tr> <tr> <td>609 – 3,056</td> <td>609</td> </tr> <tr> <td>0 – 608</td> <td>All cases</td> </tr> </tbody> </table>                                                                                                                                                                                                                                                                                                                                                                                                                                                                                                                         | Total Number of Annual Discharges | Number of Annual Records to be Sampled | ≥ 6,117 | 1,224 | 3,057 – 6,116 | 20% | 609 – 3,056 | 609 | 0 – 608 | All cases |
| Total Number of Annual Discharges | Number of Annual Records to be Sampled                                                                                                                                                                                                                                                                                                                                                                                                                                                                                                                                                                                                                                                                                                                                                                                                                                                                                                |                                   |                                        |         |       |               |     |             |     |         |           |
| ≥ 6,117                           | 1,224                                                                                                                                                                                                                                                                                                                                                                                                                                                                                                                                                                                                                                                                                                                                                                                                                                                                                                                                 |                                   |                                        |         |       |               |     |             |     |         |           |
| 3,057 – 6,116                     | 20%                                                                                                                                                                                                                                                                                                                                                                                                                                                                                                                                                                                                                                                                                                                                                                                                                                                                                                                                   |                                   |                                        |         |       |               |     |             |     |         |           |
| 609 – 3,056                       | 609                                                                                                                                                                                                                                                                                                                                                                                                                                                                                                                                                                                                                                                                                                                                                                                                                                                                                                                                   |                                   |                                        |         |       |               |     |             |     |         |           |
| 0 – 608                           | All cases                                                                                                                                                                                                                                                                                                                                                                                                                                                                                                                                                                                                                                                                                                                                                                                                                                                                                                                             |                                   |                                        |         |       |               |     |             |     |         |           |
| Citations                         | <p>CMS. “Inpatient Psychiatric Facility Quality Reporting Program Manual.” Quality Reporting Center, November 10, 2016.<br/> <a href="https://www.qualityreportingcenter.com/globalassets/migrated-pdf/ipf_programmanual_v2.2_20161110_final508.pdf">https://www.qualityreportingcenter.com/globalassets/migrated-pdf/ipf_programmanual_v2.2_20161110_final508.pdf</a>.</p> <p>CMS Measure Inventory Tool (CMIT). “Transition Record with Specified Elements Received by Discharged Patients (Discharges from an Inpatient Facility to Home/Self Care or Any Other Site of Care).” Centers of Medicare and Medicaid Services, May 31, 2019.<br/> <a href="https://cmit.cms.gov/CMIT_public/ReportMeasure?measureId=2584">https://cmit.cms.gov/CMIT_public/ReportMeasure?measureId=2584</a>.</p> <p>CMS Measure Inventory Tool (CMIT). “Timely Transmission of Transition</p>                                                          |                                   |                                        |         |       |               |     |             |     |         |           |

|  |                                                                                                                                                                                                                                                                                                            |
|--|------------------------------------------------------------------------------------------------------------------------------------------------------------------------------------------------------------------------------------------------------------------------------------------------------------|
|  | Record (Discharges from an Inpatient Facility to Home/Self Care or Any Other Site of Care) (CTR-AD).” Centers of Medicare and Medicaid Services, May 31, 2019. <a href="https://cmit.cms.gov/CMIT_public/ReportMeasure?measureId=2585">https://cmit.cms.gov/CMIT_public/ReportMeasure?measureId=2585</a> . |
|--|------------------------------------------------------------------------------------------------------------------------------------------------------------------------------------------------------------------------------------------------------------------------------------------------------------|

**Appendix 3.** Distribution of hospital-level 30-day readmission rates (n=1,513)

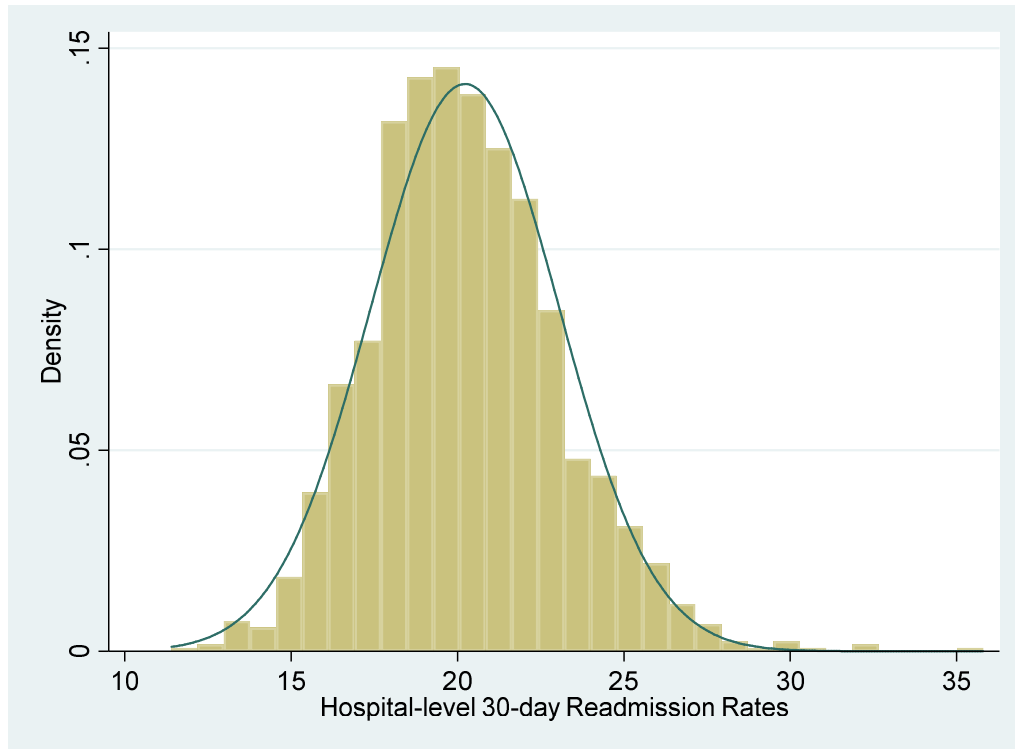

**Appendix 4.** Descriptive statistics for all hospitals with readmission rates (n=1,513)<sup>a</sup>

|             | n     | Mean  | Standard Deviation | Range       |
|-------------|-------|-------|--------------------|-------------|
| READ-30-IPF | 1,513 | 20.2% | 2.8%               | 11.4%-35.8% |



|                               |       |       |       |            |
|-------------------------------|-------|-------|-------|------------|
| FUH-7 (July 2015-June 2017)   | 1,458 | 30.2% | 13.4% | 0%-95.8%   |
| FUH-30 (July 2015-June 2017)  | 1,467 | 53.3% | 14.3% | 5.4%-95.8% |
| “Transition-1” (Jan-Dec 2017) | 1,493 | 50.6% | 37.1% | 0%-100%    |
| “Transition-2” (Jan-Dec 2017) | 1,491 | 47.0% | 36.3% | 0%-100%    |

a. Includes hospitals excluded from main analysis due to missing variables

**Appendix 5.** Maps depicting state variation on publicly reported psychiatric quality measures (Source: Hospital Compare) <sup>a, b</sup>

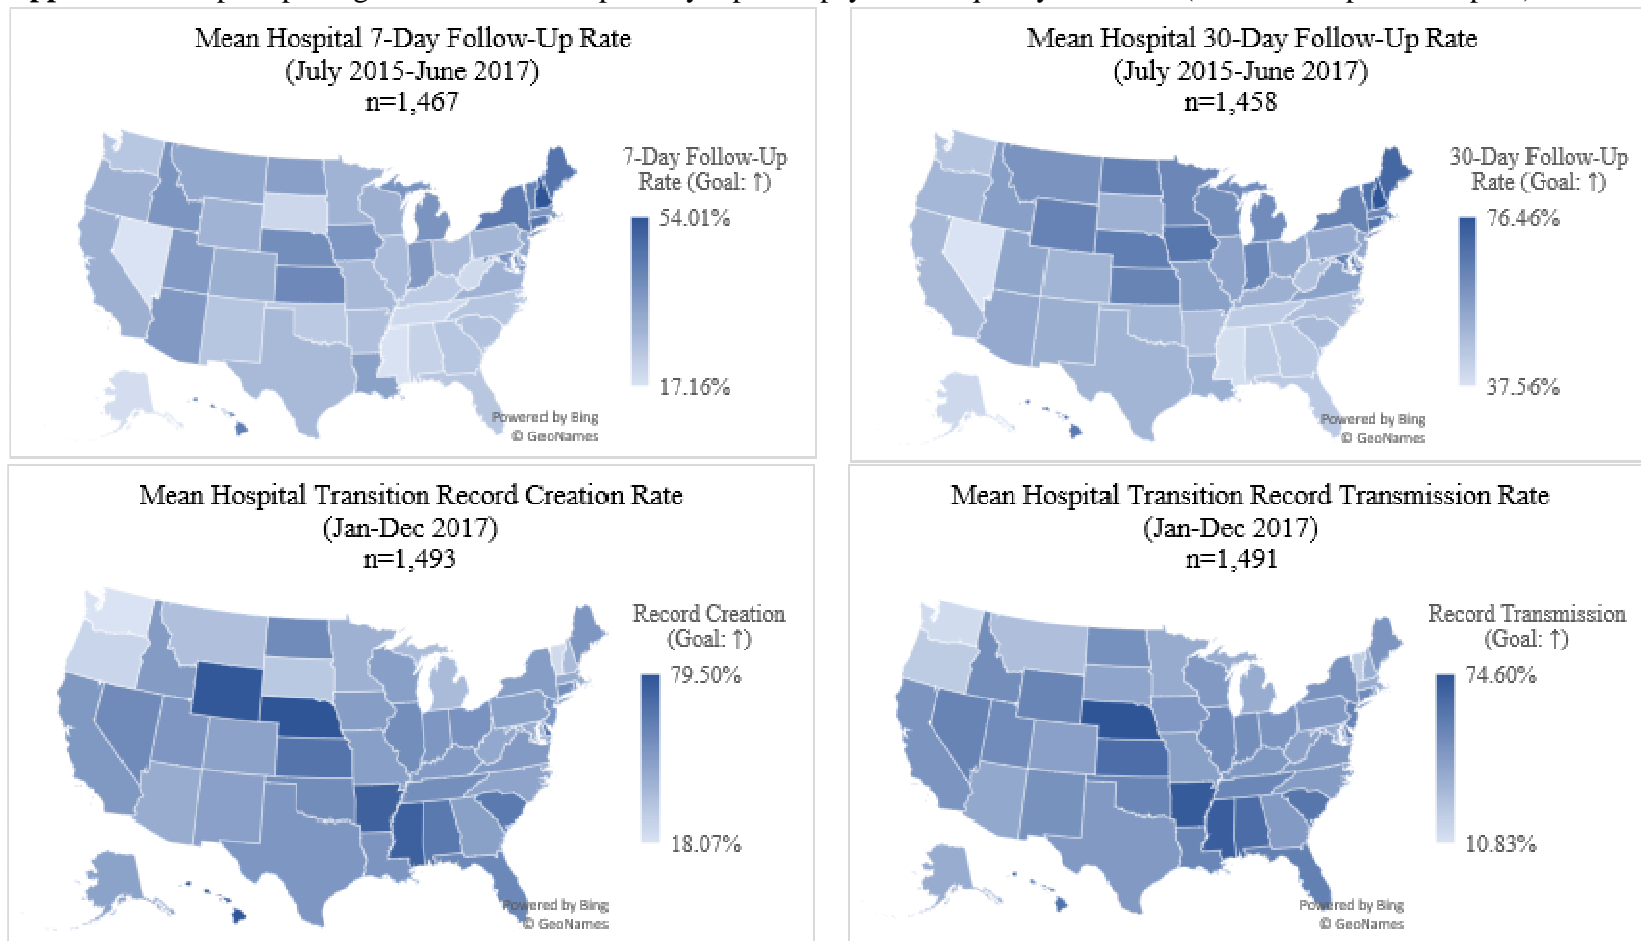

- a. Limited to facilities with publicly reported 30-day readmission rates
- b. Puerto Rico not displayed (Mean facility-level 7-day follow-up rate=28.61%, 30-day follow-up rate=40.52%, transition record creation rate=45.14%, record transmission rate= 45.29%)

**Appendix 6.** Screen capture of presentation of “30-day all-cause readmission after psychiatric hospitalization” on the Hospital Compare Website\*

**▼ Unplanned readmission**

Returning to the hospital for unplanned care can increase the risk of infections, and cost more money. Providing high quality hospital care can prevent patients from returning, and reduce their stay if they have to come back. The measure below shows the percentage of patients who return to the hospital for an unplanned inpatient admission after leaving.

[Show Graphs](#)

|                                                                                                                                                       |                                     | NATIONAL RATE |
|-------------------------------------------------------------------------------------------------------------------------------------------------------|-------------------------------------|---------------|
| <b>Patients readmitted to any hospital within 30 days of discharge from the inpatient psychiatric facility</b><br><i>Lower percentages are better</i> | No Different than the National Rate | 20.1%         |

\*Image captured on 1/25/2020 from <https://www.medicare.gov/hospitalcompare/search.html?>
